# Supplementary material for: Interface engineering of W2C/W2N co-catalyst on g-C3N4 nanosheets for boosted H2 evolution and 4-nitrophenol removal
Source: Royal Society of Chemistry journal article supplement (doi:10.1039/d2en00104g), 2022-01-01
Supplement: d2en00104g1.pdf [file d2en00104g1.pdf]

Supporting Information

**Interface engineering of W<sub>2</sub>C/W<sub>2</sub>N co-catalyst on g-C<sub>3</sub>N<sub>4</sub> nanosheets for boosted H<sub>2</sub> evolution and 4-nitrophenol removal**

Tong Song,<sup>a</sup> Xiao Zhang,<sup>b\*</sup> and Ping Yang<sup>a\*</sup>

School of Material Science and Engineering, University of Jinan, Jinan, 250022, PR China. E-mail: mse\_yangp@ujn.edu.cn

W/A School of Mines: Minerals, Energy and Chemical Engineering, Curtin University, Perth WA6845, Australia. E-mail: xiao.zhang7@postgrad.curtin.edu.au

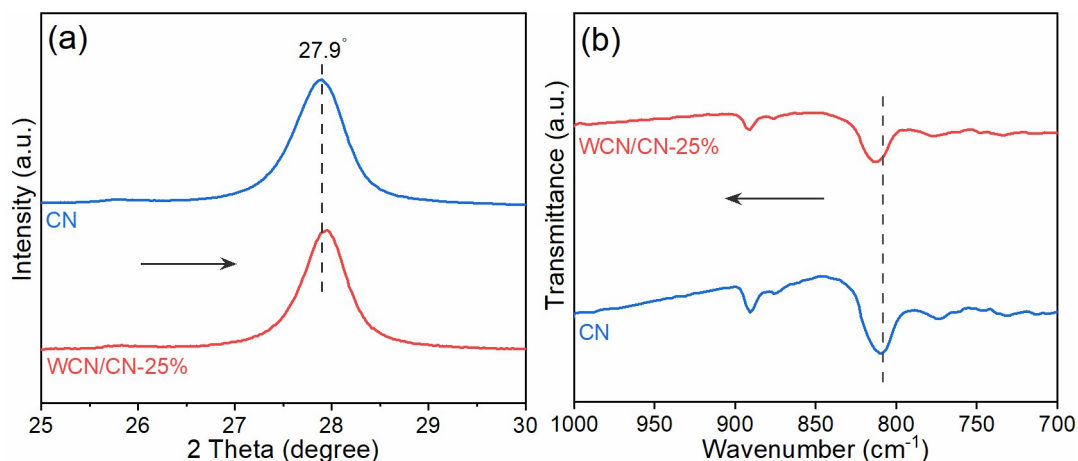

**Fig. S1.** (a) Enlarged XRD patterns of CN and WCN/CN-25% (25 to 30 degrees) (b) Enlarged FTIR spectra of CN and WCN/CN-25% (700 to 1000  $\text{cm}^{-1}$ ).

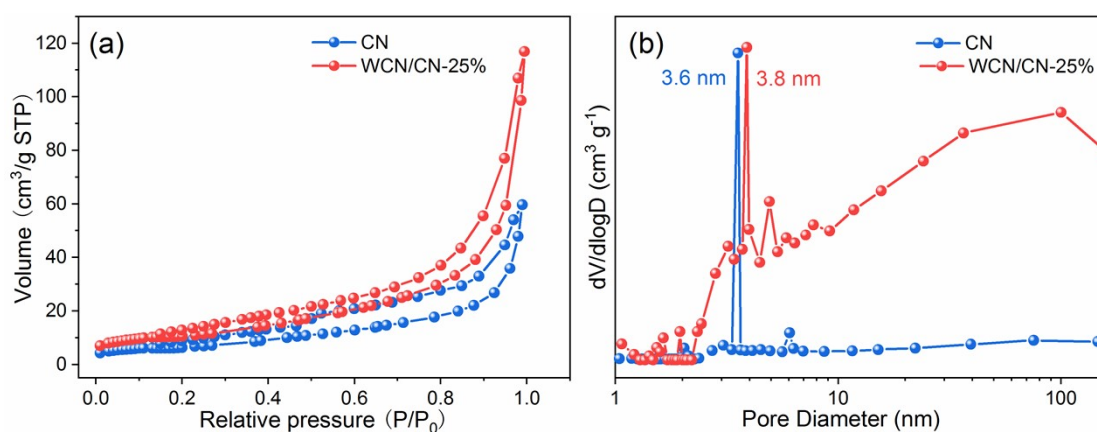

**Fig. S2.** (a) Enlarged XRD patterns of CN and WCN/CN-25% (25 to 30 degrees) (b) Enlarged FTIR spectra of CN and WCN/CN-25% (700 to 1000  $\text{cm}^{-1}$ ).

Table S1. BET surface areas, pore volumes and the average pore sizes of samples.

| Sample     | $S_{\text{BET}}$ ( $\text{m}^2/\text{g}$ ) | $V_{\text{Total}}$ ( $\text{cm}^3/\text{g}$ ) | $D_{\text{pore}}$ (nm) |
|------------|--------------------------------------------|-----------------------------------------------|------------------------|
| CN         | 21.7                                       | 0.09                                          | 3.6                    |
| WCN/CN-25% | 36.6                                       | 0.18                                          | 3.8                    |

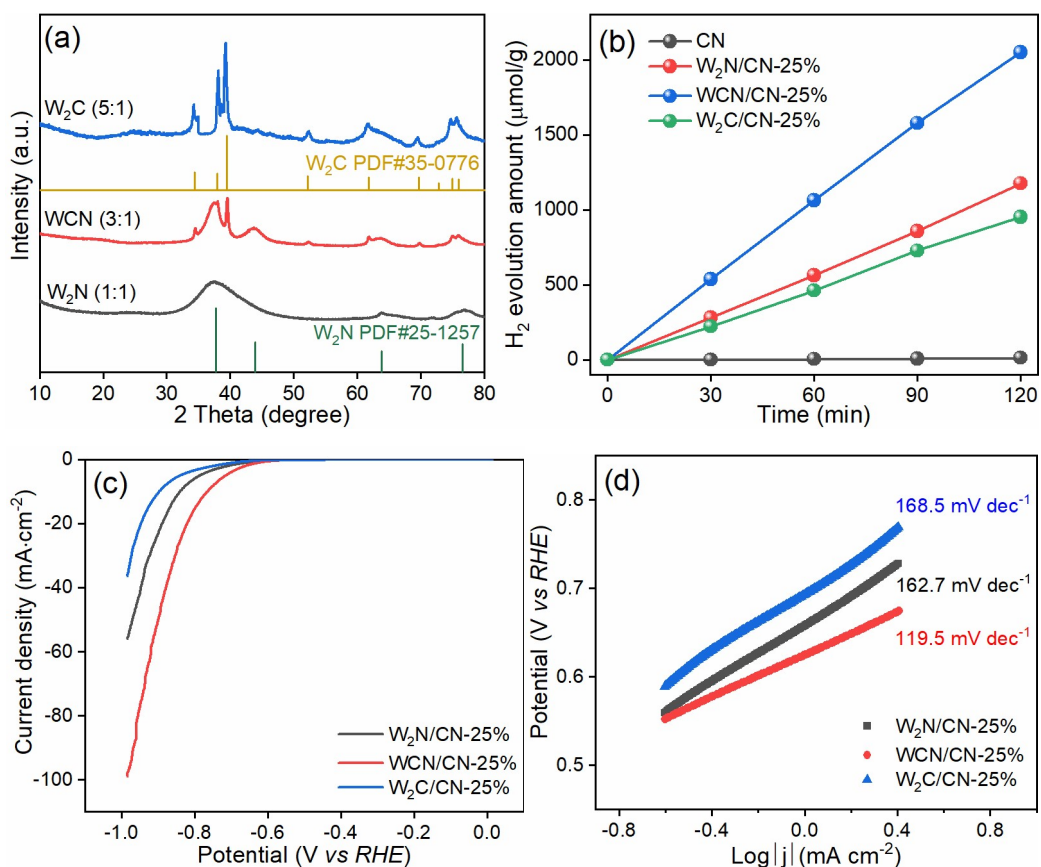

**Fig. S3.** (a) XRD patterns of  $W_2N$ ,  $W_2C$  and WCN (b) Time-dependent hydrogen generation plots (c) HER plots (d) The corresponding Tafel plots of  $W_2N/CN-25\%$ ,  $WCN/CN-25\%$  and  $W_2C/CN-25\%$  (0.5 M  $H_2SO_4$ ).

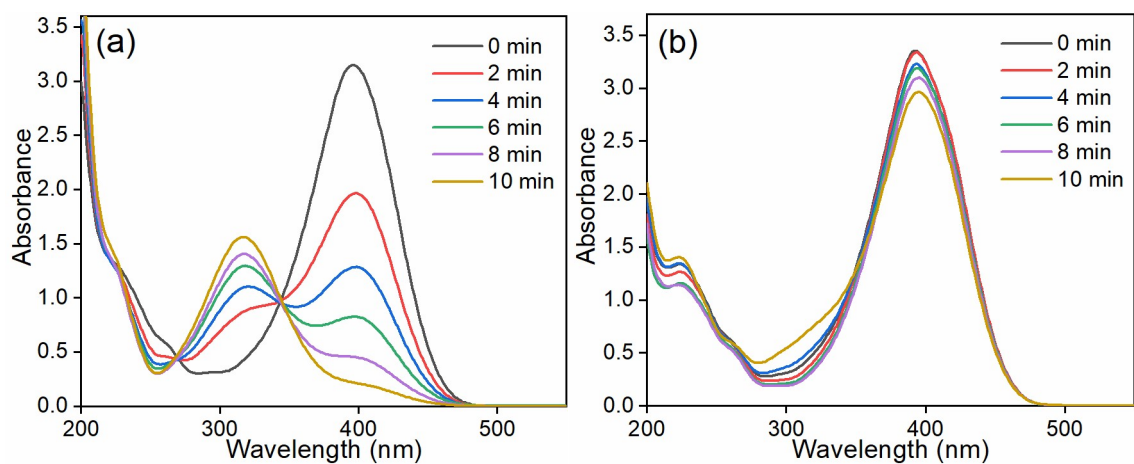

**Fig. S4.** Time-dependent UV-Vis absorption spectra of 4-NP with the presence of  $NaBH_4$  over (a)  $WCN/CN-25\%$  (b) CN under visible light irradiation.

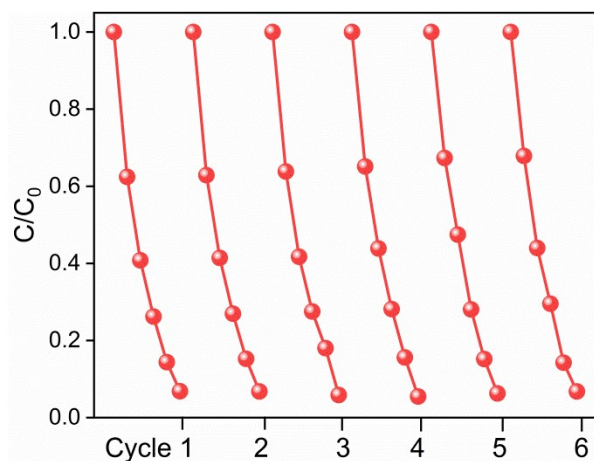

**Fig. S5.** Recycling stability of WCN/CN-25% for the photo-assisted 4-NP removal reaction.

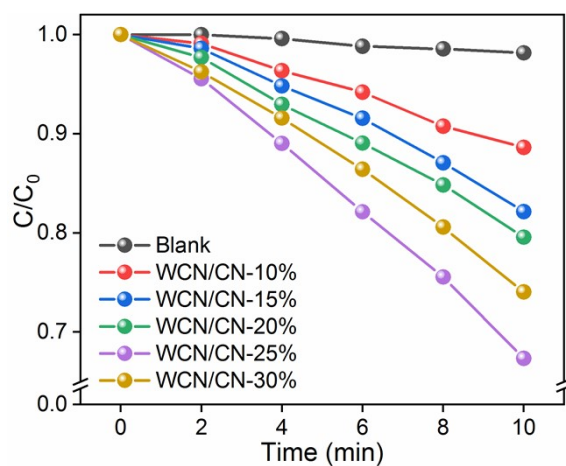

**Fig. S6.** Photodegradation plots of 4-NP over WCN/CN with different loading amount.

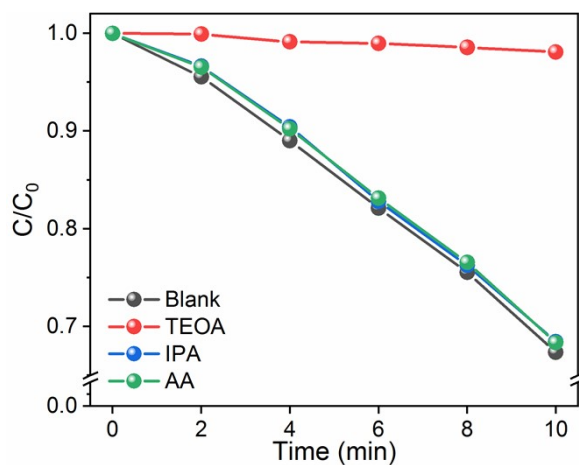

**Fig. S7.** Active species trapping experiment of WCN/CN-25% (light, no NaBH<sub>4</sub>).

**Table S2.** The AQE of WCN/CN-25%.

| $\lambda$ (nm) | H <sub>2</sub> evolution amount ( $\mu\text{mol}$ ) | P*S (mW) | AQE (%) |
|----------------|-----------------------------------------------------|----------|---------|
| 420            | 12.48                                               | 23.9     | 8.26    |

$$AQE\% = \frac{Ne}{Np} = \frac{2 * M * N_A * h * c}{P * S * t * \lambda} * 100\% = 8.26\% \quad (1)$$

Where,  $N_e$ ,  $N_p$ ,  $M$ ,  $N_A$ ,  $h$ ,  $c$ ,  $P$ ,  $S$ ,  $t$  and  $\lambda$  represents the amount of reaction electrons, the incident photons, the amount of generated H<sub>2</sub> molecule, the Avogadro constant, the Planck constant, the speed of light, the photo intensity, the irradiation area, the irradiation time and the wavelength of the light, respectively.

**Table S3.** PL lifetime parameters of CN and WCN/CN-25%.

| Sample     | $\tau_1$ (ns) | B <sub>1</sub> (%) | $\tau_2$ (ns) | B <sub>2</sub> (%) | $\tau_3$ (ns) | B <sub>3</sub> (%) | $\tau$ (ns) |
|------------|---------------|--------------------|---------------|--------------------|---------------|--------------------|-------------|
| CN         | 6.23          | 40.12              | 28.24         | 27.13              | 1.23          | 32.75              | 22.00       |
| WCN/CN-25% | 3.89          | 36.75              | 22.72         | 23.06              | 0.54          | 40.18              | 18.11       |

$$\tau = \frac{B_1\tau_1^2 + B_2\tau_2^2 + B_3\tau_3^2}{B_1\tau_1 + B_2\tau_2 + B_3\tau_3} \quad (2)$$
